# Supplementary material for: Avian Influenza Virus Surveillance in Wild Birds in Georgia: 2009–2011
Source: PubMed Central journal article supplement (PMC3596303; doi:10.1371/journal.pone.0058534), 2013-03-13
Supplement: pone.0058534.s001.pdf [file pone.0058534.s001.pdf]

| Species Group     |                     |                        |                           |                            |                          |              |                  |                   |                    |                        |
|-------------------|---------------------|------------------------|---------------------------|----------------------------|--------------------------|--------------|------------------|-------------------|--------------------|------------------------|
| Dabbling ducks    | Diving ducks        | Other ducks            | Other waterbirds          | Geese                      | Gulls                    | Galliformes  | Rails and Crakes | Terns             | Passerines         | Raptors                |
| Common Teal       | Common Pochard      | Common Goldeneye       | Black-crowned Night Heron | Greylag Goose              | Armenian Gull            | Common Quail | Baillon's Crake  | Black Tern        | Blackbird          | Common Buzzard         |
| Eurasian Wigeon   | Ferrugineous duck   | Common Shelduck        | Cattle Egret              | Lesser White-fronted Goose | Black-headed Gull        |              | Common Coot      | Caspian Tern      | Common Kingfisher  | Eurasian Sparrowhawk   |
| Gadwall           | Greater Scaup       | Red-breasted Merganser | Demoiselle Crane          | White-fronted Goose        | Caspian Gull             |              | Corn Crake       | Common Tern       | Common Starling    | European Honey-buzzard |
| Garganey          | Red-crested Pochard | Ruddy Shelduck         | Glossy Ibis               |                            | Herring Gull             |              | Little Crake     | Little Tern       | Common Woodpigeon  | Levant Sparrowhawk     |
| Mallard           | Tufted Duck         | Smew                   | Great Bittern             |                            | Lesser Black-backed Gull |              | Moorhen          | Sandwich Tern     | European Bee-eater |                        |
| Northern Pintail  | Velvet Scoter       |                        | Great Cormorant           |                            | Little Gull              |              | Purple Swamphen  | Whiskered Tern    | Grey Wagtail       |                        |
| Northern Shoveler |                     |                        | Great Crested Grebe       |                            | Mediterranean Gull       |              | Spotted Crake    | White-winged Tern | Hooded Crow        |                        |
|                   |                     |                        | Grey Heron                |                            | Mew Gull                 |              | Water Rail       |                   | Mistle Thrush      |                        |
|                   |                     |                        | Little Bittern            |                            | Slender-billed Gull      |              |                  |                   | Water Pipit        |                        |
|                   |                     |                        | Little Egret              |                            | Yellow-legged Gull       |              |                  |                   | White Wagtail      |                        |
|                   |                     |                        | Little Grebe              |                            |                          |              |                  |                   | Yellow Wagtail     |                        |
|                   |                     |                        | Purple Heron              |                            |                          |              |                  |                   |                    |                        |
|                   |                     |                        | Pygmy Cormorant           |                            |                          |              |                  |                   |                    |                        |
|                   |                     |                        | Squacco Heron             |                            |                          |              |                  |                   |                    |                        |
