# Supplementary material for: Avian Influenza Virus Surveillance in Wild Birds in Georgia: 2009–2011
Source: PubMed Central journal article supplement (PMC3596303; doi:10.1371/journal.pone.0058534), 2013-03-13
Supplement: pone.0058534.s002.pdf [file pone.0058534.s002.pdf]

| Species (English)  | Age (Adult, Juvenile, Undetermined) | Sex | Sampling site   | Sample number | Date of sampling | Sample Type                    | MA-CT | H5 | H7 | H7-CT | Virus Isolation | E1 | E2 | Virus pathotype  | HA subtype | NA subtype |
|--------------------|-------------------------------------|-----|-----------------|---------------|------------------|--------------------------------|-------|----|----|-------|-----------------|----|----|------------------|------------|------------|
| Black-headed Gull  | A                                   | U   | Poti            | 217-686       | 2010/01/21       | cloacal swab                   | 16.69 | n  | n  |       | positive        | 0  | 1  | LP AI            | H11        | N1         |
| Common Coot        | A                                   | M   | Natanebi        | 217-577       | 2010/01/22       | tracheal or oropharyngeal swab | 24.69 | n  | n  |       | positive        | 0  | 1  | LP AI            | H6         | N2         |
| Black-headed Gull  | A                                   | U   | Poti            | 217-716       | 2010/01/22       | cloacal swab                   | 28.36 | n  | n  |       | negative        | 0  |    | LP AI            |            |            |
| Northern Shoveler  | A                                   | F   | Paliastomi lake | 217-825       | 2010/01/30       | cloacal swab                   | 23.00 | n  | n  |       | positive        | 1  |    | LP AI            | H2         | N3         |
| Mallard            | A                                   | F   | Paliastomi lake | 217-814       | 2010/01/30       | tracheal or oropharyngeal swab | 26.64 | n  | p  | 30.32 | positive        | 1  |    | LP AI            | H10/H7     | N1         |
| Mallard            | A                                   | F   | Paliastomi Lake | 217-72        | 2010/01/31       | cloacal swab                   | 26.80 | n  | n  |       | negative        | 0  |    | LP AI            |            |            |
| Mallard            | A                                   | F   | Hunting shop 1  | 217-968       | 2010/02/03       | cloacal swab                   | 28.59 | n  | n  |       | negative        | 0  |    | LP AI            |            |            |
| Mallard            | A                                   | F   | Hunting shop 1  | 217-1050      | 2010/02/03       | cloacal swab                   | 29.86 | n  | p  | 32.85 | positive        | 1  |    | LP AI            | H7         | N3         |
| Mallard            | A                                   | F   | Hunting shop 1  | 217-1053      | 2010/02/03       | cloacal swab                   | 29.86 | n  | p  | 32.85 | negative        | 0  |    | LP AI            |            |            |
| Mallard            | A                                   | F   | Hunting shop 1  | 217-974       | 2010/02/03       | cloacal swab                   | 29.97 | n  | n  |       | negative        | 0  |    | LP AI            |            |            |
| Mallard            | A                                   | F   | Hunting shop 1  | 217-976       | 2010/02/03       | cloacal swab                   | 30.94 | n  | n  |       | negative        | 0  |    | LP AI            |            |            |
| Mallard            | A                                   | F   | Hunting shop 1  | 217-1026      | 2010/02/03       | tracheal or oropharyngeal swab | 33.96 | n  | n  |       | positive        | 1  |    | LP AI            | H7         | N7         |
| Mallard            | A                                   | M   | Poti            | 217-1486      | 2010/02/18       | cloacal swab                   | 22.46 | n  | n  |       | positive        | 1  |    | LP AI            | H1         | N1         |
| Armenian Gull      | A                                   | U   | Poti            | 217-1660      | 2010/04/28       | cloacal swab                   | 27.45 | n  | n  |       | negative        | 0  |    | LP AI            |            |            |
| Moorhen            | U                                   | U   | Natanebi        | 217-2665      | 2010/08/18       | tracheal or oropharyngeal swab | 33.40 | n  | n  |       | negative        | 0  |    | LP AI            |            |            |
| Common Quail       | U                                   | F   | Telavi          | 217-3291      | 2010/08/30       | cloacal swab                   | 32.90 | n  | n  |       | negative        | 0  |    | LP AI            |            |            |
| Little Grebe       | U                                   | U   | Natanebi        | 217-3774      | 2010/09/08       | cloacal swab                   | 26.87 | n  | n  |       | negative        | 0  |    | LP AI            |            |            |
| Yellow-legged Gull | U                                   | U   | Paliastomi Lake | 217-4609      | 2010/09/29       | cloacal swab                   | 28.00 | n  | n  |       | negative        | 0  |    | LP AI            |            |            |
| Armenian gull      | A                                   | U   | Paliastomi Lake | 217-4660      | 2010/10/12       | cloacal swab                   | 18.24 | n  | n  |       | negative        | 0  |    | LP AI            |            |            |
| Armenian gull      | A                                   | U   | Paliastomi Lake | 217-4671      | 2010/10/12       | cloacal swab                   | 19.21 | n  | n  |       | negative        | 0  |    | LP AI            |            |            |
| Armenian gull      | A                                   | U   | Paliastomi Lake | 217-5250      | 2010/10/12       | cloacal swab                   | 22.59 | n  | n  |       | negative        | 0  |    | LP AI            |            |            |
| Caspian Gull       | A                                   | U   | Paliastomi Lake | 217-5197      | 2010/10/12       | cloacal swab                   | 28.10 | n  | n  |       | negative        | 0  |    | LP AI            |            |            |
| Armenian gull      | A                                   | U   | Paliastomi Lake | 217-4667      | 2010/10/12       | cloacal swab                   | 35.32 | n  | n  |       | negative        | 0  |    | LP AI            |            |            |
| Yellow-legged Gull | A                                   | U   | Chorokhi Delta  | 217-4691      | 2010/10/19       | fresh feces                    | 32.16 | n  | n  |       | positive        | 1  |    | LP AI            | H13        | N2         |
| Black-headed Gull  | A                                   | U   | Paliastomi Lake | 217-5676      | 2010/12/07       | cloacal swab                   | 22.39 | n  | n  |       | negative        | 0  |    | LP AI            |            |            |
| Mallard            | U                                   | U   | Paliastomi Lake | 217-5542      | 2010/12/19       | cloacal swab                   | 25.44 | n  | n  |       | negative        | 0  |    | LP AI            |            |            |
| Black-headed Gull  | A                                   | U   | Paliastomi Lake | 217-6036      | 2011/01/05       | cloacal swab                   | 26.66 | n  | n  |       | negative        | 0  |    | LP AI            |            |            |
| Black-headed Gull  | A                                   | U   | Paliastomi Lake | 217-6042      | 2011/01/05       | cloacal swab                   | 26.85 | n  | n  |       | negative        | 0  |    | LP AI            |            |            |
| Mallard            | U                                   | F   | Paliastomi Lake | 217-5877      | 2011/01/23       | cloacal swab                   | 26.14 | n  | n  |       | positive        | 1  |    | LP AI            | H1         | N1         |
| Mallard            | U                                   | F   | Paliastomi Lake | 217-5883      | 2011/01/23       | cloacal swab                   | 26.63 | n  | n  |       | negative        | 0  |    | LP AI            |            |            |
| Mallard            | U                                   | F   | Paliastomi Lake | 217-5939      | 2011/01/24       | cloacal swab                   | 30.52 | n  | n  |       | negative        | 0  |    | LP AI            |            |            |
| Mallard            | U                                   | F   | Paliastomi Lake | 217-5943      | 2011/01/24       | cloacal swab                   | 36.38 | n  | n  |       | negative        | 0  |    | LP AI            |            |            |
| Mallard            | U                                   | M   | Paliastomi Lake | 217-6142      | 2011/01/26       | cloacal swab                   | 27.40 | n  | n  |       | negative        | 0  |    | LP AI            |            |            |
| Mallard            | U                                   | M   | Paliastomi Lake | 217-6134      | 2011/01/26       | cloacal swab                   | 27.73 | n  | p  | 30.17 | not performed   |    |    | Not identifiable |            |            |
| Mallard            | U                                   | F   | Paliastomi Lake | 217-6182      | 2011/01/31       | cloacal swab                   | 25.16 | n  | n  |       | negative        | 0  |    | LP AI            |            |            |
| Mallard            | U                                   | M   | Paliastomi Lake | 217-6322      | 2011/02/01       | cloacal swab                   | 27.43 | n  | n  |       | negative        | 0  |    | LP AI            |            |            |
| Common Goldeneye   | U                                   | F   | Paliastomi Lake | 217-7222      | 2011/02/08       | cloacal swab                   | 26.67 | n  | n  |       | negative        | 0  |    | LP AI            |            |            |
| Common Goldeneye   | U                                   | F   | Paliastomi Lake | 217-7220      | 2011/02/08       | cloacal swab                   | 32.19 | n  | n  |       | negative        | 0  |    | LP AI            |            |            |
| Northern Pintail   | U                                   | F   | Paliastomi Lake | 217-7322      | 2011/02/09       | cloacal swab                   | 22.50 | n  | n  |       | negative        | 0  |    | LP AI            |            |            |
| Mallard            | U                                   | F   | Paliastomi Lake | 217-7348      | 2011/02/09       | cloacal swab                   | 32.28 | n  | n  |       | negative        | 0  |    | LP AI            |            |            |
| Mallard            | U                                   | F   | Paliastomi Lake | 217-7502      | 2011/02/12       | cloacal swab                   | 28.04 | n  | n  |       | positive        | 1  |    | LP AI            | H10        | N4         |
| Black-headed Gull  | U                                   | U   | Paliastomi Lake | 217-8458      | 2011/04/20       | fresh feces                    | 15.63 | n  | n  |       | positive        | 1  |    | LP AI            | H13        | N8         |
| Black-headed Gull  | U                                   | U   | Paliastomi Lake | 217-8415      | 2011/04/20       | fresh feces                    | 16.38 | n  | n  |       | positive        | 1  |    | LP AI            | H9         | N1         |
| Black-headed Gull  | U                                   | U   | Paliastomi Lake | 217-8388      | 2011/04/20       | fresh feces                    | 19.27 | n  | n  |       | positive        | 1  |    | LP AI            | H13        | N8         |
| Black-headed Gull  | U                                   | U   | Paliastomi Lake | 217-8441      | 2011/04/20       | fresh feces                    | 22    | n  | n  |       | positive        | 1  |    | LP AI            | H13        | N8         |
| Black-headed Gull  | U                                   | U   | Paliastomi Lake | 217-8436      | 2011/04/20       | fresh feces                    | 22.83 | n  | n  |       | positive        | 1  |    | LP AI            | H13        | N8         |
| Black-headed Gull  | U                                   | U   | Paliastomi Lake | 217-8385      | 2011/04/20       | fresh feces                    | 29.11 | n  | n  |       | negative        | 0  |    | LP AI            |            |            |
| Black-headed Gull  | U                                   | U   | Paliastomi Lake | 217-8440      | 2011/04/20       | fresh feces                    | 34.64 | n  | n  |       | negative        | 0  |    | LP AI            |            |            |
| Black-headed Gull  | U                                   | U   | Paliastomi Lake | 217-8416      | 2011/04/20       | fresh feces                    | 35.94 | n  | n  |       | negative        | 0  |    | LP AI            |            |            |
| Black-headed Gull  | U                                   | U   | Paliastomi Lake | 217-8391      | 2011/04/20       | fresh feces                    | 36.18 | n  | n  |       | negative        | 0  |    | LP AI            |            |            |
| Black-headed Gull  | U                                   | U   | Paliastomi Lake | 217-8421      | 2011/04/20       | fresh feces                    | 36.73 | n  | n  |       | negative        | 0  |    | LP AI            |            |            |
| Black-headed Gull  | U                                   | U   | Paliastomi Lake | 217-8435      | 2011/04/20       | fresh feces                    | 36.88 | n  | n  |       | negative        | 0  |    | LP AI            |            |            |
| Black-headed Gull  | U                                   | U   | Paliastomi Lake | 217-8387      | 2011/04/20       | fresh feces                    | 36.91 | n  | n  |       | negative        | 0  |    | LP AI            |            |            |
| Black-headed Gull  | U                                   | U   | Paliastomi Lake | 217-8434      | 2011/04/20       | fresh feces                    | 37.01 | n  | n  |       | negative        | 0  |    | LP AI            |            |            |
| Black-headed Gull  | U                                   | U   | Paliastomi Lake | 217-8433      | 2011/04/20       | fresh feces                    | 37.52 | n  | n  |       | negative        | 0  |    | LP AI            |            |            |
| Black-headed Gull  | U                                   | U   | Paliastomi Lake | 217-8417      | 2011/04/20       | fresh feces                    | 38.12 | n  | n  |       | negative        | 0  |    | LP AI            |            |            |
| Black-headed Gull  | U                                   | U   | Paliastomi Lake | 217-8428      | 2011/04/20       | fresh feces                    | 38.26 | n  | n  |       | negative        | 0  |    | LP AI            |            |            |
| Black-headed Gull  | U                                   | U   | Paliastomi Lake | 217-8427      | 2011/04/20       | fresh feces                    | 38.4  | n  | n  |       | negative        | 0  |    | LP AI            |            |            |
| Black-headed Gull  | U                                   | U   | Paliastomi Lake | 217-8408      | 2011/04/20       | fresh feces                    | 38.54 | n  | n  |       | negative        | 0  |    | LP AI            |            |            |
| Black-headed Gull  | U                                   | U   | Paliastomi Lake | 217-8443      | 2011/04/20       | fresh feces                    | 39.38 | n  | n  |       | negative        | 0  |    | LP AI            |            |            |
| Black-headed Gull  | U                                   | U   | Paliastomi Lake | 217-8380      | 2011/05/02       | fresh feces                    | 20.52 | n  | n  |       | positive        | 1  |    | LP AI            | H9         | N3         |
| Black-headed Gull  | U                                   | U   | Paliastomi Lake | 217-8444      | 2011/05/02       | fresh feces                    | 24.79 | n  | n  |       | positive        | 1  |    | LP AI            | H9         | N3         |
| Black-headed Gull  | U                                   | U   | Paliastomi Lake | 217-8375      | 2011/05/02       | fresh feces                    | 34.01 | n  | n  |       | negative        | 0  |    | LP AI            |            |            |
| Black-headed Gull  | U                                   | U   | Paliastomi Lake | 217-8368      | 2011/05/02       | fresh feces                    | 35.82 | n  | n  |       | negative        | 0  |    | LP AI            |            |            |
| Black-headed Gull  | U                                   | U   | Paliastomi Lake | 217-8372      | 2011/05/02       | fresh feces                    | 36.37 | n  | n  |       | negative        | 0  |    | LP AI            |            |            |
| Black-headed Gull  | U                                   | U   | Paliastomi Lake | 217-8424      | 2011/05/02       | fresh feces                    | 37.42 | n  | n  |       | negative        | 0  |    | LP AI            |            |            |
| Black-headed Gull  | U                                   | U   | Paliastomi Lake | 217-8367      | 2011/05/02       | fresh feces                    | 38.33 | n  | n  |       | negative        | 0  |    | LP AI            |            |            |
| Black-headed Gull  | U                                   | U   | Paliastomi Lake | 217-8450      | 2011/05/02       | fresh feces                    | 38.40 | n  | n  |       | negative        | 0  |    | LP AI            |            |            |
| Mediterranean Gull | U                                   | U   | Paliastomi Lake | 217-8989      | 2011/05/03       | fresh feces                    | 20.44 | n  | n  |       | positive        | 1  |    | LP AI            | H9         | N3         |
| Common Teal        | A                                   | F   | Madatapa        | 217-10028     | 2011/09/20       | tracheal or oropharyngeal swab | 22.78 | n  | n  |       | positive        | 1  |    | LP AI            | H3         | N8         |
| Mallard            | A                                   | U   | Madatapa        | 217-10049     | 2011/09/21       | cloacal swab                   | 25.66 | n  | n  |       | positive        | 1  |    | LP AI            | H3         | N8         |
| Yellow-legged Gull | U                                   | U   | Paliastomi Lake | 217-10377     | 2011/10/29       | fresh feces                    | 23.21 | n  | n  |       | positive        | 1  |    | LP AI            | H13        | N6         |
| Yellow-legged Gull | J                                   | U   | Chorokhi Delta  | 217-10261     | 2011/10/30       | cloacal swab                   | 17.89 | n  | n  |       | negative        | 0  |    | LP AI            |            |            |
| Yellow-legged Gull | J                                   | U   | Chorokhi Delta  | 217-10260     | 2011/10/30       | tracheal or oropharyngeal swab | 31.06 | n  | n  |       | negative        | 0  |    | LP AI            |            |            |
| Yellow-legged Gull | A                                   | U   | Chorokhi Delta  | 217-10264     | 2011/10/30       | tracheal or oropharyngeal swab | 33.72 | n  | n  |       | negative        | 0  |    | LP AI            |            |            |
| Yellow-legged Gull | A                                   | U   | Chorokhi Delta  | 217-10262     | 2011/10/30       | tracheal or oropharyngeal swab | 36.7  | n  | n  |       | negative        | 0  |    | LP AI            |            |            |
| Garganey           | A                                   | F   | Paliastomi Lake | 217-10098     | 2011/11/08       | cloacal swab                   | 27.46 | n  | n  |       | positive        | 1  |    | LP AI            | H4         | N2         |
| Mallard            | A                                   | M   | Paliastomi Lake | 217-10096     | 2011/11/08       | cloacal swab                   | 34.53 | n  | n  |       | negative        | 0  |    | LP AI            |            |            |
| Yellow-legged Gull | U                                   | U   | Tbilisi River   | 217-10184     | 2011/11/10       | fresh feces                    | 31.21 | n  | n  |       | positive        | 1  |    | LP AI            | 0          | 0          |
| Mallard            | A                                   | M   | Paliastomi Lake | 217-9604      | 2011/11/14       | tracheal or oropharyngeal swab | 32.94 | n  | n  |       | negative        | 0  |    | LP AI            |            |            |
| Mallard            | A                                   | F   | Paliastomi Lake | 217-9603      | 2011/11/14       | cloacal swab                   | 36.68 | n  | n  |       | negative        | 0  |    | LP AI            |            |            |
| Mallard            | A                                   | M   | Paliastomi Lake | 217-9615      | 2011/11/14       | cloacal swab                   | 38.03 | n  | n  |       | negative        | 0  | 0  | LP AI            |            |            |
| Black-headed Gull  | U                                   | U   | Paliastomi Lake | 217-10221     | 2011/11/15       | fresh feces                    | 23.5  | n  | n  |       | positive        | 1  |    | LP AI            | H13        | N6         |
| Black-headed Gull  | U                                   | U   | Paliastomi Lake | 217-10224     | 2011/11/15       | fresh feces                    | 39.36 | n  | n  |       | negative        | 0  |    | LP AI            |            |            |
