# Supplementary material for: Avian Influenza Virus Surveillance in Wild Birds in Georgia: 2009–2011
Source: PubMed Central journal article supplement (PMC3596303; doi:10.1371/journal.pone.0058534), 2013-03-13

**Proportion of genetic clades containing viruses isolated from Europe, Central Asia and East Asia by country**

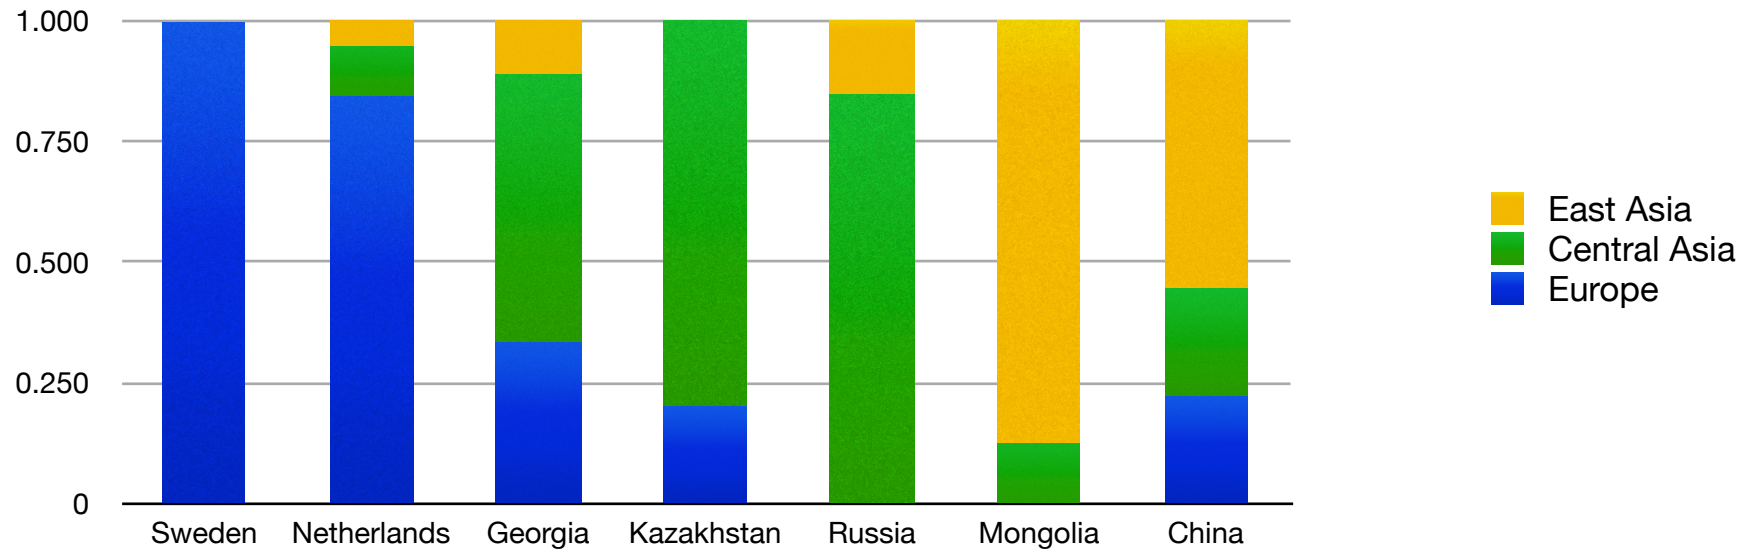

Supplement: pone.0058534.s004.pdf [file pone.0058534.s004.pdf]
